# Supplementary material for: A fast-responsive fluorescent turn-on probe for nitroreductase imaging in living cells
Source: Royal Society of Chemistry journal article supplement (doi:10.1039/d0ra09512e), 2021-01-01
Supplement: d0ra09512e1.pdf [file d0ra09512e1.pdf]

## Supporting Information

### A fast-responsive fluorescent turn-on probe for nitroreductase imaging in living cells

Chengli Jia, Yong Zhang, Yuesong Wang, Min Ji\*

*School of Biological Sciences and Medical Engineering, Southeast University, Nanjing, 210009*

### Contents

|                                                                                           |   |
|-------------------------------------------------------------------------------------------|---|
| 1. Reported fluorescent probes.....                                                       | 2 |
| 2. The characterization of NTR-NO <sub>2</sub> .....                                      | 3 |
| 3. The measurement of fluorescence quantum yields .....                                   | 4 |
| 4. The HRMS analysis of the products .....                                                | 5 |
| 5. The fluorescent spectra of NTR-NO <sub>2</sub> responding with NaBH <sub>4</sub> ..... | 6 |
| 6. Cytotoxicity assays of probe NTR-NO <sub>2</sub> at different concentrations.....      | 6 |
| 7. Reference.....                                                                         | 7 |

## 1. Reported fluorescent probes

**Table S1.** Comparison of fluorescent probes for palladium detection

| Probe                                                                               | $\lambda_{ex}/\lambda_{em}$<br>(nm) | Stokes<br>shift<br>(nm) | Response time<br>(min) | Limit of<br>detection<br>(ng/mL) | Reference                                                            |
|-------------------------------------------------------------------------------------|-------------------------------------|-------------------------|------------------------|----------------------------------|----------------------------------------------------------------------|
| 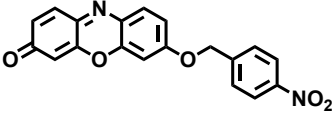   | 564/586                             | 22                      | 90                     | ————                             | <i>Dyes and Pigments</i><br><b>2019</b> , 171.                       |
|    | 467/526                             | 59                      | 60                     | 27                               | <i>Sensors and Actuators B: Chemical</i> <b>2018</b> , 276, 397-403. |
|  | 613/658                             | 45                      | 70                     | 180                              | <i>Chem. Commun.</i> ,<br><b>2013</b> , 49, 10820–                   |
|  | 695/750                             | 55                      | 15                     | 77                               | <i>Chem. Commun.</i> ,<br><b>2013</b> , 49, 2554–<br>2556.           |
|  | 470/520                             | 50                      | 5                      | 9.6                              | <i>Analyst</i> , <b>2015</b> , 140,                                  |
|  | 450/550                             | 100                     | 30                     | ————                             | <i>J. Photochem. Photobiol. A Chem.</i><br><b>2018</b> , 353, 292–   |

|                                                                                   |         |     |     |    |                                                                                     |
|-----------------------------------------------------------------------------------|---------|-----|-----|----|-------------------------------------------------------------------------------------|
| 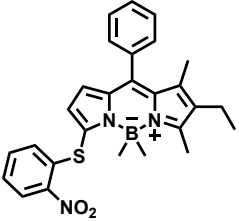 | 450/540 | 90  | 180 | 22 | <i>Organic &amp; Biomolecular Chemistry</i> <b>2020</b> , <i>18</i> (25), 4744-4747 |
|  | 405/534 | 129 | 60  | 48 | <i>Analyst</i> <b>2020</b> , <i>145</i> (16), 5657-5663                             |
|  | 430/541 | 111 | 20  | 58 | <b>This work</b>                                                                    |

## 2. The characterization of NTR-NO<sub>2</sub>

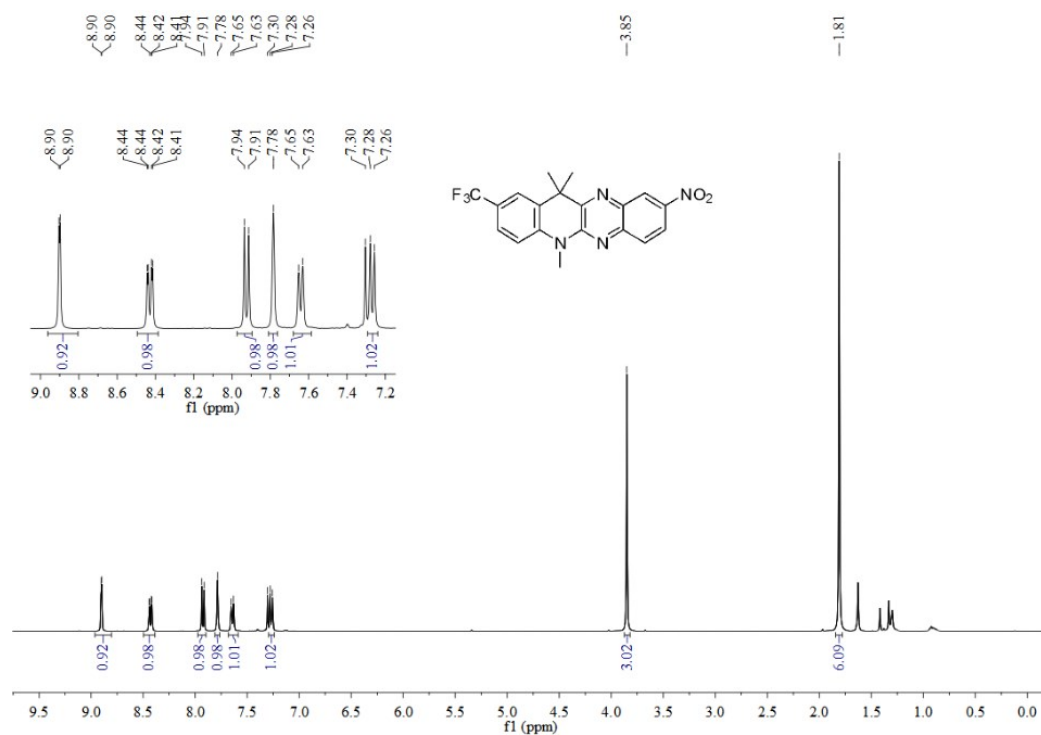

**Fig. S1:** <sup>1</sup>H NMR spectrum of NTR-NO<sub>2</sub>

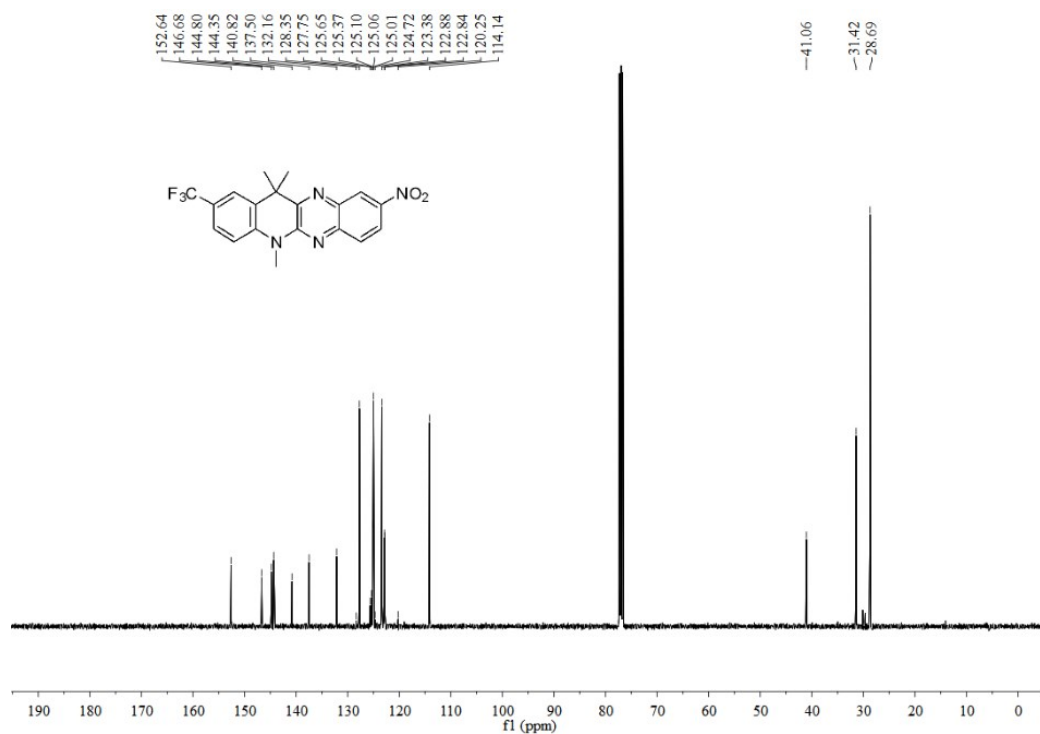

Fig. S2: <sup>13</sup>C NMR spectrum of NTR-NO<sub>2</sub>

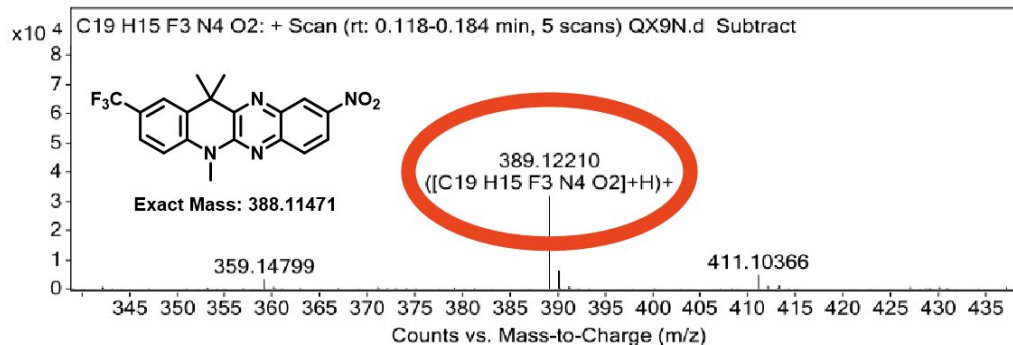

Fig. S3: HRMS spectrum of NTR-NO<sub>2</sub>

### 3. The measurement of fluorescence quantum yields

The quantum yield values were calculated by using coumarin-153 in ethanol ( $\Phi = 0.38$ ) as a standard according to the following formula<sup>1-3</sup>:

$$Y_u = Y_s \cdot \frac{F_u}{F_s} \cdot \frac{A_s}{A_u} \cdot \left[ \frac{G_u}{G_s} \right]^2$$

Where,  $Y_u$  is the quantum yield of NTR-NH<sub>2</sub>;  $Y_s$  is the quantum yield of coumarin-153 ( $\Phi = 0.38$ ) in ethanol;  $F$  is the integrated emission intensity (peak area);  $A$  is the absorbance at  $\lambda_{ex}$ ;

**Table S2.** Photophysical properties of NTR-NH<sub>2</sub>

(DMSO:PBS=1:5, pH = 7.4)

| Compound            | $\lambda_{abs}$ (nm) | $\lambda_{em}$ (nm) | Stokes shift (nm) | $Y_u$ |
|---------------------|----------------------|---------------------|-------------------|-------|
| NTR-NH <sub>2</sub> | 430                  | 541                 | 111               | 0.43  |

#### 4. The HRMS analysis of the products

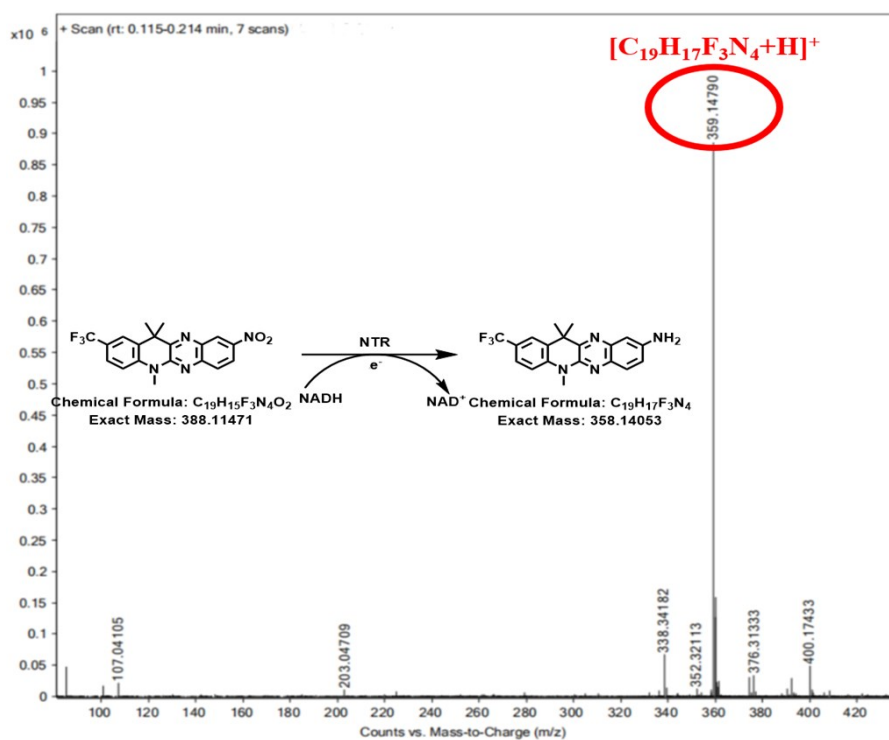

**Fig. S4:** HRMS spectrum of NTR-NO<sub>2</sub>

## 5. The fluorescent spectra of NTR-NO<sub>2</sub> responding with NaBH<sub>4</sub>

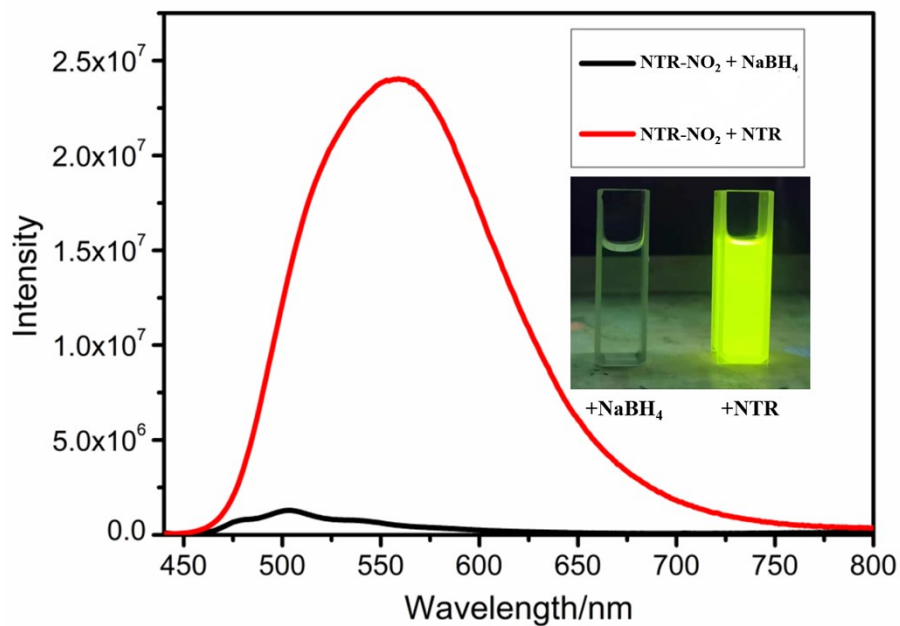

**Fig. S5:** The fluorescence spectra of probe NTR-NO<sub>2</sub> (10 $\mu$ M) incubated with NTR (red) and NaBH<sub>4</sub> (black) in the presence of NADH (500 $\mu$ M)

## 6. Cytotoxicity assays of probe NTR-NO<sub>2</sub> at different concentrations

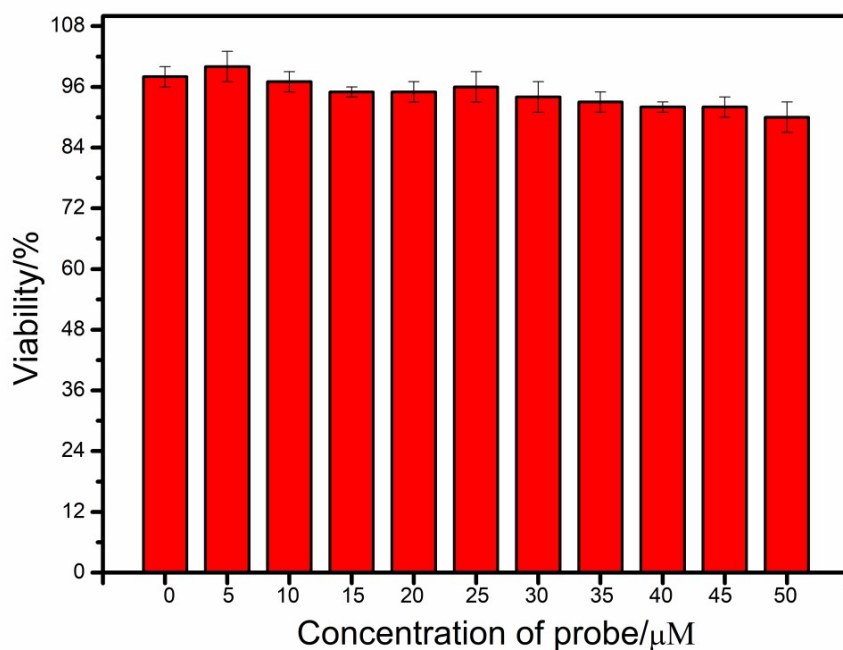

**Fig. S6:** MTT assay for the viability of HeLa cells treated with various concentrations of probe NTR-NO<sub>2</sub> for 24h

## 7. Reference

1. D. Guo, Z. P. Dong, C. Luo, W.Y. Zan, S. Q. Yan and X. J. Yao, RSC Adv., 2014, 4, 5718-5725.
2. C. Kar, M. A. Adhikari, A. Ramesh and G. Das, Inorg. Chem., 2013, 52, 743-752.
3. D. R. Haynes, A. Tokmakoff, S. M. George, Chemical Physics Letters, 1993, 214, 50-56.
